# Supplementary material
Source: PubMed Central journal article supplement (PMC4833111)
Supplement: supp_kfu125_toxsci-14-0153-File011.pdf [file supp_kfu125_toxsci-14-0153-File011.pdf]

## Supplementary Material

### Identification of *Drosophila* based endpoints for the assessment and understanding of xenobiotic mediated male reproductive adversities

Snigdha Misra<sup>\*,‡</sup>, Anshuman Singh<sup>\*</sup>, Ratnasekhar CH<sup>†,‡</sup>, Vandana Sharma<sup>\*,‡</sup>, Mohana Krishna Reddy Mudiam<sup>†,‡</sup> and Kristipati Ravi Ram<sup>\*,‡,§</sup>

<sup>\*</sup> Embryotoxicology, <sup>†</sup> Analytical Chemistry, CSIR-Indian Institute of Toxicology Research, Mahatma Gandhi Marg, Lucknow, UP, 226001, INDIA. <sup>‡</sup> Academy of Scientific and Innovative Research (AcSIR), New Delhi, INDIA

<sup>§</sup>Corresponding Author

Consists of supplementary figures S1-S3, Tables S1-S3 and additional methodological details.

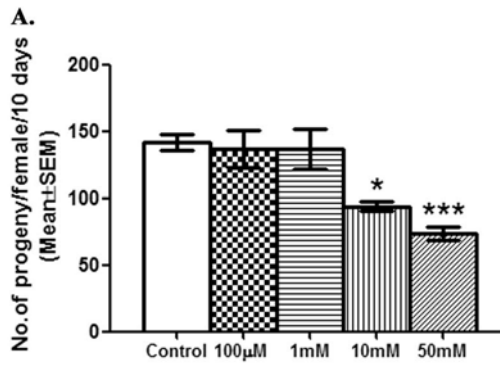

Fig. S1. Reduced fertility of males exposed to DBP for 72h. Panel (A) represents the number of progeny produced over a period of 10 days by females mated to males exposed to various concentrations of DBP at the adult stage (within 24 h of their emergence) for 72 h. We observed significant reduction in the number of progeny produced by females mated to males exposed 10 mM (\* $p < 0.05$ ) or 50 mM (\*\* $p < 0.001$ ) DBP for 72 h. All experiments were repeated three times (N=15-20 males/mates per replicate/group).

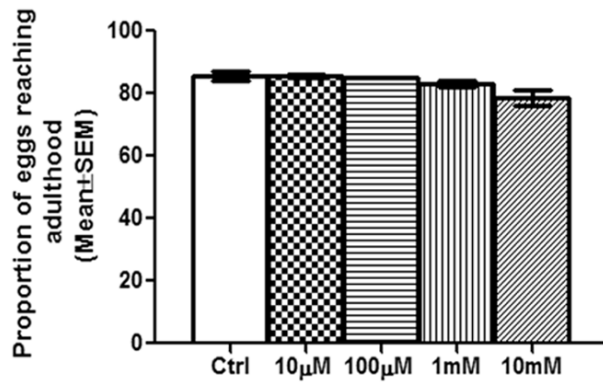

Fig. S2. Proportion of eggs reaching adulthood on control and DBP food. To determine, if exposure to DBP causes developmental lethality, 100 eggs in triplicate were placed on food containing DBP at concentrations ranging from 10  $\mu$ M to 10 mM or food without test chemical (control). Similar proportions of eggs reached the adult stage in both control and DBP foods ( $p=0.06$  based on one-way ANOVA). In addition, we did not observe any gross morphological, reproductive tract abnormalities, in flies exposed to DBP during their development, when compared to controls.

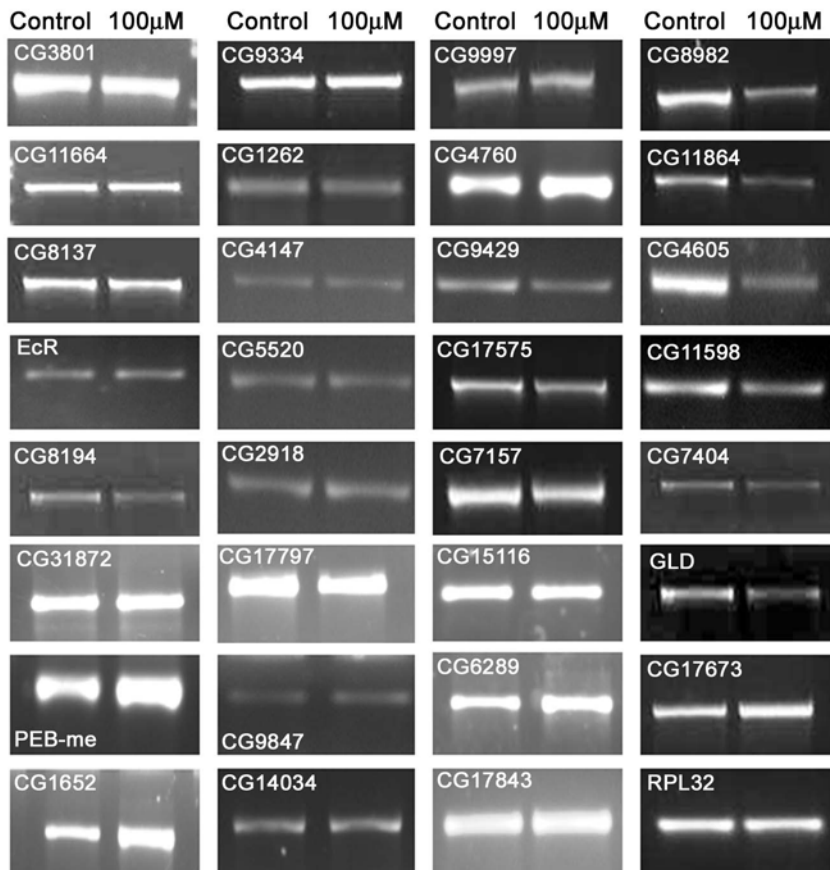

Fig S3. Modulation of a few genes expressed in the reproductive tract or encoding seminal proteins in males exposed to DBP during development. To determine the consequence of exposure to DBP at the gene expression level, we analyzed the transcript levels of 31 genes (represented in panels) in control (control lane) or exposed males (100 µM DBP). We used RPL32 (RPL 32 panel) as an internal control for the quality as well as quantity of the template. Of the four columns, the last vertical column represents the panels of the candidate genes, whose transcript levels were significantly up or down in response to chemical exposure, according to densitometry.

Table S1 GC-MS/MS parameters for estimation of DBP and MBP in Drosophila

| Compound | Retention time (min) | Quantitative transition | Qualitative transitions             |
|----------|----------------------|-------------------------|-------------------------------------|
| DBP      | 12.09                | 149 → 65@ 30eV          | 149 → 93@ 20 eV<br>223 → 149@ 10 eV |
| MBP      | 9.33                 | 223 → 75@ 10eV          | 149 → 121@ 10 eV<br>223 → 75@ 10 eV |

Table S2. Genes and their predicted gene ontology categories included in the present study (Schmittgen and Livak 2008):

| S.No | Predicted gene ontology categories                                         | Genes                                                                                                                     |
|------|----------------------------------------------------------------------------|---------------------------------------------------------------------------------------------------------------------------|
| 1.   | Protease inhibitor                                                         | Acp76A (CG3801), CG8137, CG9334, CG6289, Acp62F (CG1262)                                                                  |
| 2.   | Lipase activity                                                            | CG17097, CG18284, CG11598, CG14034, CG31872                                                                               |
| 3.   | Peptides and post mating                                                   | Acp36DE (CG7157), Sex peptide (CG17673), Acp32CD (CG4605), Ovulin (CG8982), Est-6 (CG6917), GLD (CG1152), PEB-me (CG2668) |
| 4.   | Lectins/ Ca <sup>2+</sup> binding                                          | Acp29AB (CG17797), CG1652, CG1656, CG7304, CG9429                                                                         |
| 5.   | Protease                                                                   | CG11864, CG9997, CG11664                                                                                                  |
| 6.   | Hsp cognates                                                               | CG4147, CG2918, CG5520                                                                                                    |
| 7.   | FAD linked sulfahydryl oxidase                                             | CG17843                                                                                                                   |
| 8.   | Isomerase activity                                                         | CG6988, CG9847                                                                                                            |
| 9.   | Ribonuclease                                                               | CG8194                                                                                                                    |
| 10.  | Cysteine rich secretory protein                                            | CRISP (CG17575)                                                                                                           |
| 11.  | Ligand activated DNA binding                                               | Estrogen related receptor (CG7404, ERR) and Ecdysone receptor (EcR)                                                       |
| 12.  | Boule (Drosophila homolog of vertebrate DAZ ; Eberhart <i>et al.</i> 1996) | CG4760                                                                                                                    |

Table S3. Primers used for Real time PCR

|         |                                                                    |
|---------|--------------------------------------------------------------------|
| RPL32   | Forward CCAGTCGGATCGATATGCTAA<br>Reverse CCGATGTTGGGCATCAGATA      |
| CG8982  | Forward AACTGTGAACCGCAGACTTT<br>Reverse GTTGGCTTCCTGAAACTGATTG     |
| CG11864 | Forward CGTTCACTTGGGCTATAGGAATAA<br>Reverse GTGAAGGAGCTCGTGGATAATG |
| CG10586 | Forward GGCTTATCAAACCCGTGTTATTG<br>Reverse CCGCCGCAGATGAAATTATTG   |
| CG17843 | Forward GTTGAGCTCGAAGCAGAGTATAA<br>Reverse ACGTATCGCCTTGCCTTAAA    |
| CG4605  | Forward CCACGCTACATCTGCTGATAAT<br>Reverse GAGTCTTTGGAGTCGCTCTTG    |
| ERR     | Forward CACAGCGCATGGAAAGAATATC<br>Reverse GAACTCTGATCATCCAGCAGAA   |
| GLD     | Forward CCCACCTCTATCCTACGCTATT<br>Reverse CCGTCATCTGGGCAATCATAAA   |
| CG11598 | Forward GCTCACACGAGATGGGTATTT<br>Reverse GACATTCGCTGCTGAAAGAGA     |
| CG17673 | Forward TTGGTTCTCGTTTGCGTACT<br>Reverse GCACCACTTATCACGAGGATT      |

## **Supplementary methods**

### **Estimation of DBP and MBP in DBP exposed flies**

Flies (3 days old) were homogenised in 3 ml of milli-Q water using bead beater. The pH of the homogenate was adjusted to 6.0-6.5 using 900  $\mu$ L of 1M ammonium acetate (pH 7.0). To the homogenate 110  $\mu$ L of  $\beta$ -glucuronidase (Sigma, USA) was added and the mixture was hydrolyzed at 37°C for 3 h. After enzymatic hydrolysis, 0.7 g of anhydrous sodium sulphate was added. Considering the pKa of mono phthalate ester (pKa 3.4-3.6), 1.2 ml of 2 M acetic acid was added to adjust the pH to 4.0. Extraction was carried out using 5.0 ml of ethyl acetate and vortexed for 15 min. The organic phase was separated by centrifugation at 6000 rpm. This extraction procedure was repeated thrice and nitrogen stream was used to remove the solvent (ethyl acetate) from the pooled extract. Subsequently, 60  $\mu$ L of pyridine and 90  $\mu$ L of BSTFA + 1 % TMCS were added to this pooled extract and mixed over thermo mixer for 35 min at 65 °C. Finally the extract was diluted with 200 $\mu$ L of hexane and 1.0  $\mu$ L was used for the GC-MS/MS analysis. The oven temperature was programmed as follows: initial temperature was 100°C and then increased to 200°C at a rate of 15°C per min and maintained for 5 min and then increased further to 280°C at a rate of 10°C finally hold for 5.0 min. Transfer line and ion source temperatures were set at 290°C and 220°C respectively. Estimations were repeated with a minimum of two replicates per group (100 flies/replicate for control or exposed groups).

### **Conditions applied for Real time PCR**

1 cycle of pre incubation (50°C for 2 min and 95°C for 10 min) followed by 40 amplification cycles (95°C for 15 seconds, and 60°C for 1 min) and melting curve detection (95°C for 5 sec, 65°C for 1 min). Experiments were preformed in duplicate for each sample for nine genes (please see Table S3 for primer sequences). The gene expression data were analyzed using



the comparative  $2^{-\Delta\Delta CT}$  (Schmittgen and Livak 2008) considering RPL32 as the internal control. All results are given as Mean $\pm$ Standard Error of the mean.

### **Sample Preparation and Western blot Analysis**

Typically, protein equivalents of two pairs of male accessory glands or five female reproductive tracts (in 2X SDS sample buffer 0.125 M Tris pH 6.8, 10% glycerol, 2% SDS, 5% 2-Mercaptoethanol, 1 mg bromophenol blue) formed the samples. Samples were separated on 13% SDS-polyacrylamide gel, and western blotting was performed using GFP specific primary antibody (anti-GFP generated in Rabbit, diluted 1:1500 in 1X TBST, Cell signaling technology, USA). and Peroxidase–Affinipure Goat anti-rabbit secondary antibody (at a dilution of 1:3000, in 1X TBST, Jackson, USA). The blots were developed with chemiluminiscent reagent following manufacturer’s protocol (Femto; Thermo-scientific, USA), and patterns were documented using Versa-doc Imaging system (Bio-Rad, USA). The protein quantities in terms of intensities of signals in samples from control/exposed males and their mates were semi-quantitatively assessed using volume analysis algorithm of Quantity One software (Bio-Rad, USA).

### **X-gal staining**

Briefly, the dissected tissues were fixed in 2.5% glutaraldehyde for 30 min, and washed twice with 1X PBS. The wash buffer was replaced by pre warmed (65°C for atleast 15 min) staining buffer (150 mM NaCl, 1 mM MgCl<sub>2</sub>, 3 mM K<sub>4</sub>[Fe(CN)<sub>6</sub>], 3 mM K<sub>3</sub>[Fe(CN)<sub>6</sub>] in 1X PBS), and then by prewarmed staining solution containing 1/30 volume of 8% X-gal in DMSO. Staining reactions were allowed to develop for 2 h at 37°C. Tissues were washed thrice with 1X PBS and were subsequently placed on slides in a drop of physiological saline. The

coverslips were placed, sealed with nail polish, and images were captured through an inverted microscope (Nikon, Japan) at a total magnification of 100X.

Eberhart, C. G., Maines, J. Z., and Wasserman, S. A. (1996). Meiotic cell cycle requirement for a fly homologue of human Deleted in Azoospermia. *Nature* **381**, 783-5.

Schmittgen, T. D., and Livak, K. J. (2008). Analyzing real-time PCR data by the comparative C(T) method. *Nature protocols* **3**, 1101-8.
